# Supplementary material for: The Effect of Standardised Leaf Extracts of Gaultheria procumbens on Multiple Oxidants, Inflammation-Related Enzymes, and Pro-Oxidant and Pro-Inflammatory Functions of Human Neutrophils
Source: MDPI journal article supplement (doi:10.3390/molecules27103357), 2022-05-23
Supplement: s1 [file s1]

## Article

# The Effect of Standardised Leaf Extracts of *Gaultheria procumbens* on Multiple Oxidants, Inflammation-Related Enzymes, and Pro-Oxidant and Pro-Inflammatory Functions of Human Neutrophils

Piotr Michel <sup>1,\*</sup>, Sebastian Granica <sup>2</sup>, Karolina Rosińska <sup>1</sup>, Małgorzata Glige <sup>1</sup>, Jarosław Rojek <sup>1</sup>, Łukasz Poraj <sup>1</sup>, Monika Anna Olszewska <sup>1</sup>

<sup>1</sup> Department of Pharmacognosy, Faculty of Pharmacy, Medical University of Lodz, 1 Muszynskiego St., 90-151 Lodz, Poland; karolinaa.rosinskaa@gmail.com (K.R.); gosiaju11@gmail.com (M.G.); jaroslaw.rojek@o2.pl (J.R.); lukasz.poraj@gmail.com (Ł.P.); monika.olszewska@umed.lodz.pl (M.A.O.)

<sup>2</sup> Microbiota Lab, Centre for Preclinical Studies, Department of Pharmacognosy and Molecular Basis of Phytotherapy, Medical University of Warsaw, 1 Banacha St., 02-097 Warsaw, Poland; sgranica@wum.edu.pl (S.G.)

\* Correspondence: piotr.michel@umed.lodz.pl (P.M.); Tel.: +48 426779169

## Supplementary Materials:

**Table S1.** Phenolic analytes detected in *G. procumbens* leaf dry extracts by UHPLC-PDA-ESI-MS<sup>3</sup>.

**Table S2.** Correlation (*r*) coefficients and probability (*p*) values of linear relationships between antioxidant and anti-inflammatory activity parameters and phenolic contents of *G. procumbens* leaf dry extracts.

**Table S1.** Phenolic analytes detected in *G. procumbens* leaf dry extracts by UHPLC-PDA-ESI-MS<sup>3</sup>.

| Peak | Analyte                                                                                                                                     | t <sub>R</sub> (min) | UV λ <sub>max</sub> (nm) | [M–H] <sup>–</sup> m/z | MS <sup>2</sup> (% relative abundance)                                       | MS <sup>3</sup> (% relative abundance)                      | Extract |
|------|---------------------------------------------------------------------------------------------------------------------------------------------|----------------------|--------------------------|------------------------|------------------------------------------------------------------------------|-------------------------------------------------------------|---------|
| 1    | protocatechuic acid hexoside                                                                                                                | 4.1                  | 259, 293                 | 315                    | 225 (25); 153 (100); 107 (8)                                                 |                                                             | All     |
| 2    | protocatechuic acid <sup>a</sup>                                                                                                            | 4.6                  | 259, 293                 | 153                    |                                                                              |                                                             | All     |
| 3    | protocatechuic acid hexoside                                                                                                                | 5.6                  | 259, 293                 | 315                    | 225 (1); 153 (100); 107 (2)                                                  |                                                             | ME      |
| 4    | unknown compound                                                                                                                            | 5.8                  | 310                      | 331                    | 313 (100); 211 (9); 167 (42); 125 (9)                                        |                                                             | All     |
| 5    | 3- <i>O</i> -caffeoylquinic acid (neochlorogenic acid) <sup>a</sup>                                                                         | 6.4                  | 325                      | 353                    | 191 (100); 179 (50)                                                          |                                                             | All     |
| 6    | 3- <i>O</i> - <i>p</i> -coumaroylquinic acid derivative                                                                                     | 6.8                  | 310                      | 371                    | 353 (6); 325 (72); 163 (100)                                                 |                                                             | All     |
| 7    | <i>p</i> -hydroxybenzoic acid <sup>a</sup>                                                                                                  | 7.6                  | 254                      | 137                    |                                                                              |                                                             | EAE     |
| 8    | procyanidin A-type dimer                                                                                                                    | 9.4                  | 280                      | 575                    | 499 (100); 490 (84); 451 (22); 407 (17); 289 (7)                             |                                                             | All     |
| 9    | 3- <i>O</i> - <i>p</i> -coumaroylquinic acid hexoside                                                                                       | 10.3                 | 310                      | 325                    | 163 (100); 119 (9)                                                           |                                                             | All     |
| 10   | 5- <i>O</i> -caffeoylquinic acid (chlorogenic acid) <sup>a</sup>                                                                            | 11.0                 | 325                      | 353                    | 191 (100); 179 (5)                                                           |                                                             | All     |
| 11   | methyl salicylate 2- <i>O</i> -β-D-glucopyranosyl-(1→2)-[ <i>O</i> -β-D-xylopyranosyl-(1→6)]- <i>O</i> -β-D-glucopyranoside <sup>a, b</sup> | 12.6                 | 285                      | 653 *                  | 607 (100); 575 (12)                                                          |                                                             | ME, BE  |
| 12   | 4- <i>O</i> -caffeoylquinic acid (cryptochlorogenic acid) <sup>a</sup>                                                                      | 12.8                 | 325                      | 353                    | 173 (100)                                                                    |                                                             | ME, BE  |
| 13   | procyanidin B-type dimer                                                                                                                    | 14.0                 | 280                      | 577                    | 559 (17); 451 (41); <b>425 (100)</b> ; 407 (44); 289 (27)                    | 407 (100); 339 (2); 273 (7)                                 | All     |
| 14   | procyanidin B2 <sup>a</sup>                                                                                                                 | 15.2                 | 280                      | 577                    | <b>425 (100)</b> ; 407 (51); 289 (15)                                        | 407 (100); 273 (6)                                          | ME, BE  |
| 15   | procyanidin B-type trimer                                                                                                                   | 15.5                 | 280                      | 865                    | 847 (15); 739 (79); <b>713 (48)</b> ; 695 (67); 577 (79); 451 (21); 287 (38) | 695 (100); 575 (45); 561 (11); 425 (21); 405 (34); 287 (16) | All     |
| 16   | gaultherin isomer <sup>b</sup>                                                                                                              | 15.7                 | 285                      | 491 *                  | 445 (7); 413 (10); 293 (100); 149 (4)                                        |                                                             | All     |
| 17   | unknown compound                                                                                                                            | 16.2                 | 280                      | 417                    | 373 (100); 331 (75)                                                          |                                                             | ME, BE  |
| 18   | (–)-epicatechin <sup>a</sup>                                                                                                                | 16.5                 | 280                      | 289                    | 245 (100); 205 (19)                                                          |                                                             | All     |
| 19   | caffeoylquinic acid derivative                                                                                                              | 16.9                 | 325                      | 431                    | 385 (100); 277 (7); 179 (22)                                                 |                                                             | ME, BE  |
| 20   | gaultherin <sup>a</sup>                                                                                                                     | 17.1                 | 285                      | 491 *                  | 445 (7); 413 (4); 293 (100); 149 (2)                                         |                                                             | All     |
| 21   | unknown compound                                                                                                                            | 17.7                 | 280                      | 363                    | 345 (4); 183 (100); 179 (19); 143 (7); 121 (14)                              |                                                             | All     |

Table S1. Cont.

| Peak | Analyte                                                                                                                          | t <sub>R</sub> (min) | UV $\lambda_{max}$ (nm) | [M-H] <sup>-</sup> m/z | MS <sup>2</sup> (% relative abundance)                                        | MS <sup>3</sup> (% relative abundance)            | Extract |
|------|----------------------------------------------------------------------------------------------------------------------------------|----------------------|-------------------------|------------------------|-------------------------------------------------------------------------------|---------------------------------------------------|---------|
| 22   | procyanidin A-type trimer                                                                                                        | 18.4                 | 280                     | 863                    | <b>711 (100)</b> ; 573 (32); 559 (19); 451 (53); 411 (75); 289 (100)          | 693 (100); 559 (49); 541 (9); 407 (11)            | ME, BE  |
| 23   | procyanidin B-type dimer                                                                                                         | 19.3                 | 280                     | 577                    | 559 (11); 451 (38); <b>425 (100)</b> ; 407 (46); 289 (36)                     | 407 (100); 381 (13); 299 (18); 273 (4)            | All     |
| 24   | procyanidin A-type trimer (cinnamtannin B-1) <sup>a, b</sup>                                                                     | 20.0                 | 280                     | 863                    | <b>711 (100)</b> ; 693 (11); 573 (23); 559 (15); 451 (16); 411 (13); 289 (5)  | 693 (79); 559 (100); 541 (33); 463 (14); 407 (26) | All     |
| 25   | procyanidin B-type trimer (procyanidin C1) <sup>a, b</sup>                                                                       | 21.2                 | 280                     | 865                    | 847 (36); 739 (71); <b>713 (45)</b> ; 695 (100); 577 (95); 451 (19); 287 (20) | 693 (100); 561 (64); 411 (19); 243 (4)            | ME, BE  |
| 26   | procyanidin A-type trimer                                                                                                        | 21.6                 | 280                     | 863                    | <b>711 (100)</b> ; 573 (41); 559 (10); 451 (53); 411 (78); 289 (25)           | 693 (100); 559 (79); 541 (28); 463 (19); 407 (21) | ME, BE  |
| 27   | caffeoylquinic acid derivative                                                                                                   | 22.2                 | 325                     | 391                    | 225 (17); 179 (100); 161 (4); 143 (9); 119 (7); 113 (6)                       |                                                   | All     |
| 28   | procyanidin A-type dimer                                                                                                         | 22.4                 | 280                     | 575                    | 499 (100); 491 (4); 451 (8); 423 (16); 289 (22)                               |                                                   | All     |
| 29   | procyanidin A-type dimer                                                                                                         | 23.4                 | 280                     | 575                    | 499 (100); 491 (67); 451 (11); 423 (24); 289 (73)                             |                                                   | ME, BE  |
| 30   | procyanidin A-type dimer                                                                                                         | 24.7                 | 280                     | 575                    | 499 (100); 491 (21); 451 (13); 423 (18); 289 (37)                             |                                                   | All     |
| 31   | quercetin 3-O- $\beta$ -D-xylopyranosyl-(1 $\rightarrow$ 2)- $\beta$ -D-glucuronopyranoside (wintergreenoside A) <sup>a, b</sup> | 25.5                 | 257, 356                | 609                    | 477 (2); <b>301 (100)</b>                                                     | 273 (47); 255 (17); 179 (100); 151 (79)           | ME, BE  |
| 32   | procyanidin A-type dimer                                                                                                         | 26.4                 | 280                     | 575                    | 499 (23); 491 (16); 451 (6); 411 (57); 289 (100)                              |                                                   | ME, BE  |
| 33   | procyanidin A-type trimer                                                                                                        | 26.8                 | 280                     | 863                    | <b>711 (100)</b> ; 573 (58); 559 (9); 451 (58); 411 (87); 289 (29)            | 693 (100); 559 (11); 541 (15); 463 (42); 407 (28) | All     |
| 34   | 3-O-p-coumaroylquinic acid derivative                                                                                            | 27.2                 | 310                     | 487                    | 441 (100); 307 (73); 163 (7)                                                  |                                                   | ME, EAE |
| 35   | quercetin 3-O- $\beta$ -D-galactopyranoside (hyperoside) <sup>a</sup>                                                            | 27.6                 | 254, 353                | 463                    | <b>301 (100)</b>                                                              | 273 (49); 255 (19); 179 (95); 151 (75)            | All     |
| 36   | quercetin 3-O- $\beta$ -D-glucopyranoside (isoquercitrin) <sup>a</sup>                                                           | 28.5                 | 256, 353                | 463                    | <b>301 (100)</b>                                                              | 273 (53); 255 (25); 179 (100); 151 (71)           | All     |
| 37   | quercetin 3-O- $\beta$ -D-glucuronopyranoside (miquelianin) <sup>a</sup>                                                         | 29.1                 | 256, 356                | 477                    | <b>301 (100)</b>                                                              | 273 (17); 257 (16); 179 (100); 151 (61)           | All     |

Table S1. Cont.

| Peak | Analyte                                                                                             | t <sub>R</sub> (min) | UV λ <sub>max</sub> (nm) | [M-H] <sup>-</sup> m/z | MS <sup>2</sup> (% relative abundance)  | MS <sup>3</sup> (% relative abundance)            | Extract |
|------|-----------------------------------------------------------------------------------------------------|----------------------|--------------------------|------------------------|-----------------------------------------|---------------------------------------------------|---------|
| 38   | kaempferol 3-O-β-D-xylopyranosyl-(1→2)-β-D-glucuronopyranoside (wintergreenoside B) <sup>a, b</sup> | 29.4                 | 275, 345                 | 593                    | <b>285 (100)</b>                        | 267 (31); 257 (100); 241 (19); 229 (35); 151 (19) | ME, BE  |
| 39   | quercetin 3-O-α-L-arabinopyranoside (guajjaverin) <sup>a</sup>                                      | 30.8                 | 258, 356                 | 433                    | <b>301 (100)</b>                        | 273 (45); 255 (17); 179 (100); 151 (73)           | All     |
| 40   | kaempferol 3-O-β-D-glucuronopyranoside <sup>a</sup>                                                 | 33.3                 | 265, 345                 | 461                    | <b>285 (100)</b>                        | 267 (39); 257 (100); 241 (40); 229 (31); 151 (9)  | ME, BE  |
| 41   | quercetin <sup>a</sup>                                                                              | 43.7                 | 255, 364                 | 301                    | 273 (41); 255 (18); 179 (100); 151 (74) |                                                   | All     |

<sup>a</sup> confirmed by comparison with authentic standard; <sup>b</sup> detected for the first time in *G. procumbens* leaf; t<sub>R</sub>, retention times; UV λ<sub>max</sub>, absorbance maxima in PDA spectra; [M-H]<sup>-</sup>, pseudomolecular ions in MS spectra recorded in a negative ion mode; in bold – ions subjected to MS<sup>3</sup> fragmentation; \* [M+HCOO]<sup>-</sup>. The nomenclature of caffeoylquinic acids isomers is according to IUPAC.

**Table S2.** Correlation (*r*) coefficients and probability (*p*) values of linear relationships between antioxidant and anti-inflammatory activity parameters and phenolic contents of *G. procumbens* leaf dry extracts.

| <i>r</i> ( <i>p</i> ) for: | Antioxidant activity |                 |                   |                              |                 | Anti-inflammatory activity    |                  |                  |                    |
|----------------------------|----------------------|-----------------|-------------------|------------------------------|-----------------|-------------------------------|------------------|------------------|--------------------|
|                            | DPPH                 | FRAP            | TBARS             | O <sub>2</sub> <sup>•−</sup> | •OH             | H <sub>2</sub> O <sub>2</sub> | HYAL             | LOX              | COX-2              |
| TPC                        | −0.6961 (0.510)      | 0.9841 (0.114)  | −0.7996 (0.410)   | −0.7459 (0.464)              | −0.7302 (0.479) | −0.5171 (0.654)               | −0.3675 (0.760)  | −0.3351 (0.782)  | −0.8080 (0.401)    |
| TPH                        | 0.9447 (0.213)       | −0.5767 (0.609) | 0.8820 (0.312)    | −0.2889 (0.813)              | 0.9276 (0.244)  | 0.9942 (0.068)                | 0.9982 (0.038) * | 0.9956 (0.060)   | 0.8753 (0.321)     |
| TPA                        | −0.8892 (0.302)      | 0.9892 (0.094)  | −0.9497 (0.203)   | −0.4935 (0.671)              | −0.9104 (0.271) | −0.7638 (0.447)               | −0.6458 (0.553)  | −0.6190 (0.575)  | −0.9540 (0.194)    |
| TLPA                       | −0.9841 (0.114)      | 0.9032 (0.282)  | −0.9998 (0.014) * | −0.2178 (0.860)              | −0.9916 (0.083) | −0.9191 (0.258)               | −0.8407 (0.364)  | −0.8215 (0.386)  | −1.0000 (0.005) ** |
| TPHA                       | 0.8973 (0.291)       | −0.4719 (0.687) | 0.8174 (0.391)    | −0.4043 (0.735)              | 0.8747 (0.322)  | 0.9735 (0.147)                | 0.9980 (0.040) * | 0.9996 (0.018) * | 0.8092 (0.400)     |
| TSAL                       | 0.9985 (0.035) *     | −0.7795 (0.431) | 0.9777 (0.135)    | −0.0138 (0.991)              | 0.9947 (0.066)  | 0.9853 (0.109)                | 0.9431 (0.216)   | 0.9311 (0.238)   | 0.9747 (0.144)     |
| TFL                        | −0.7831 (0.427)      | 0.9988 (0.031)  | −0.8705 (0.328)   | −0.6535 (0.547)              | −0.8124 (0.396) | −0.6234 (0.571)               | −0.4847 (0.678)  | −0.4541 (0.700)  | −0.8774 (0.319)    |

TPC: total phenolic content (Folin-Ciocalteu assay) in gallic acid equivalents, TPH: total phenolic content (HPLC), TSAL: total content of salicylates (HPLC), TPA: total content of proanthocyanidins (*n*-butanol/HCl assay) in cyanidin chloride equivalents, TLPA: total content of proanthocyanidins (HPLC), TPHA: total content of phenolic acids (HPLC), TFL: total content of flavonoids (HPLC). Asterisks mean significance of the estimated linear relationship (\**p* < 0.05, \*\**p* < 0.01) for three extracts (*n* = 3).
